# Supplementary material for: Soluble Poly(amide-imide)s from Diamide–Diamine Monomer with Trifluoromethyl Groups
Source: MDPI journal article supplement (doi:10.3390/polym14030624), 2022-02-06
Supplement: s1 [file s1]

# Soluble Poly(amide-imide)s from Diamide-Diamine with Trifluoromethyl Groups

Taejoon Byun, Seong Jong Kim and Sang Youl Kim\*

Department of Chemistry, Korea Advanced Institute of Science and Technology (KAIST), Daejeon 34141, Korea.

\* Correspondence: kimsy@kaist.ac.kr; Tel.: (+)82-42-350-2834.

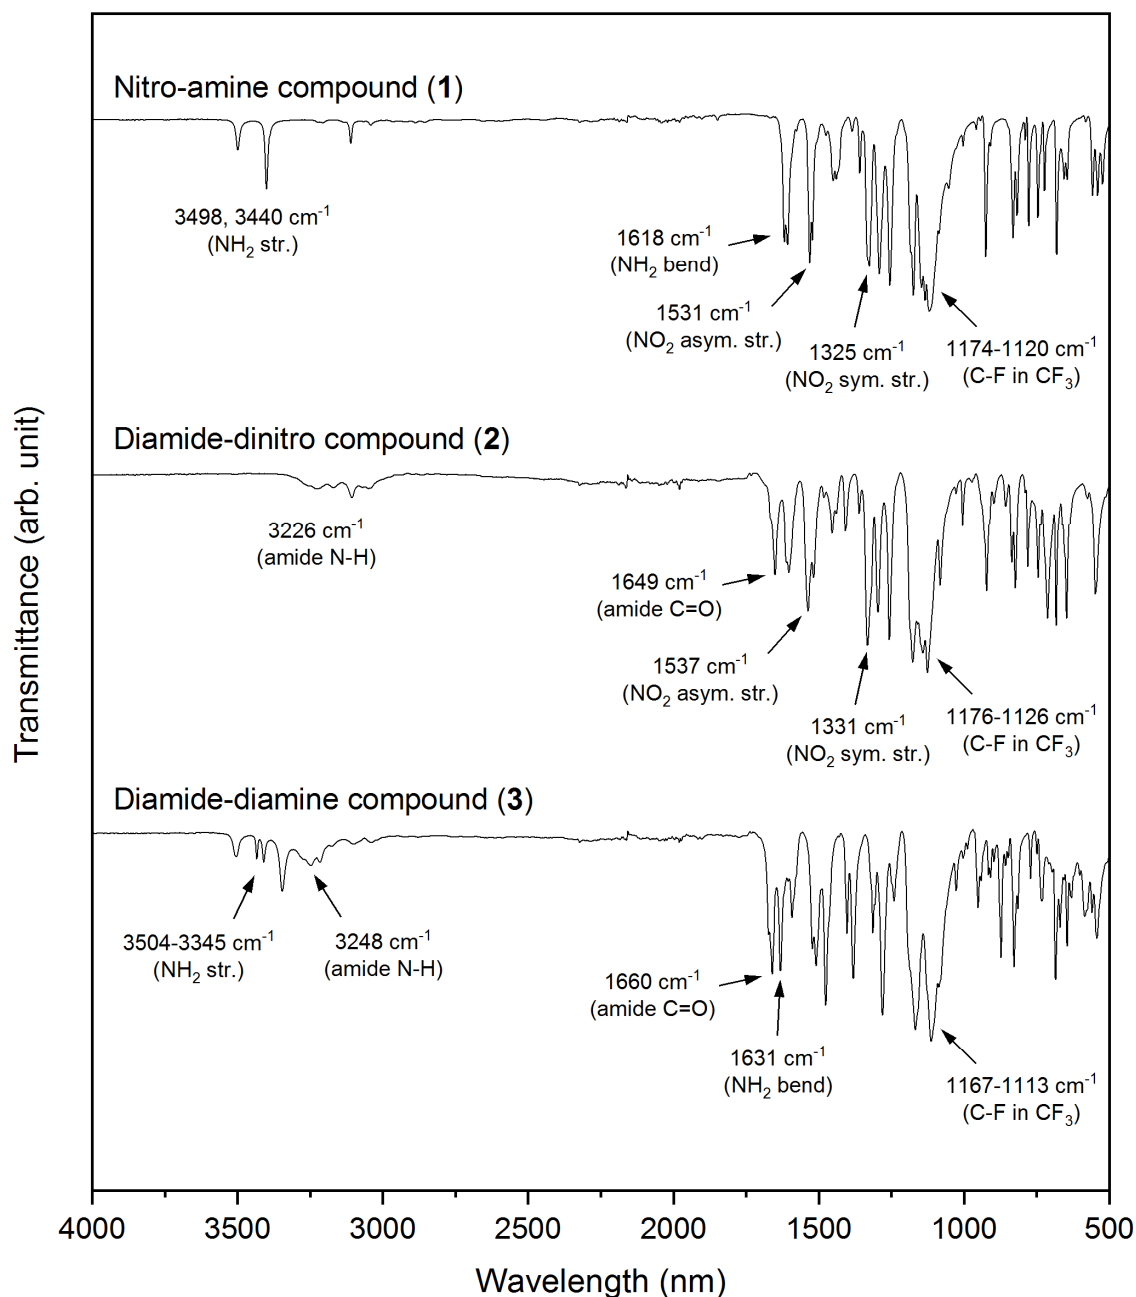

**Figure S1.** FT-IR spectra of nitro-amine (1), diamide-dinitro (2), diamide-diamine (3) compounds.

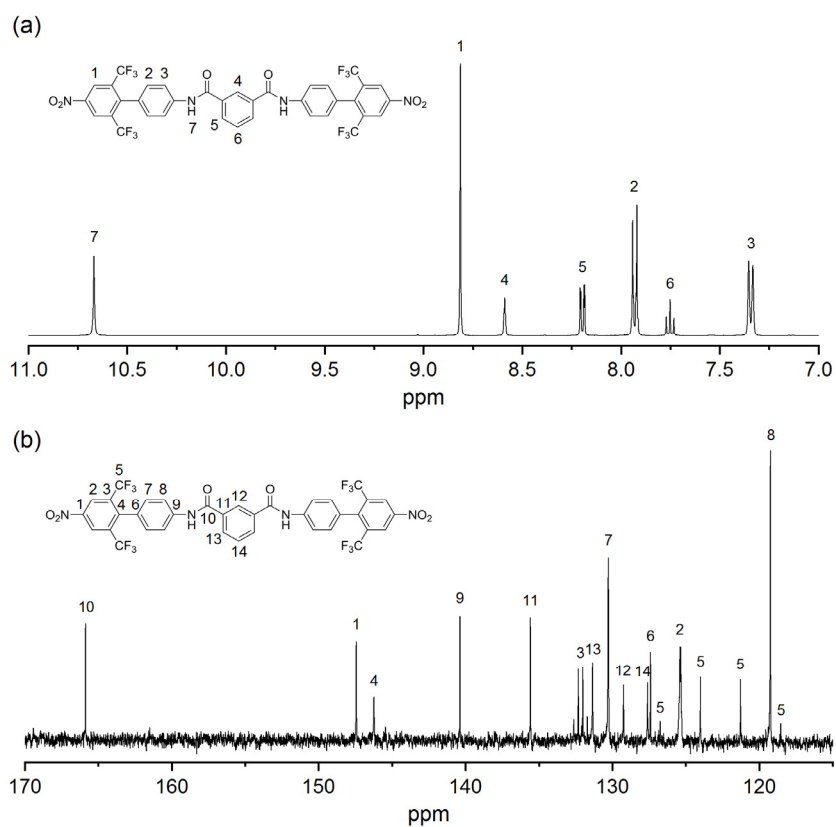

**Figure S2.** (a)  $^1\text{H}$  and (b)  $^{13}\text{C}$  NMR spectra of diamide-dinitro compound **2** ( $\text{DMSO-}d_6$ ,  $25^\circ\text{C}$ ).

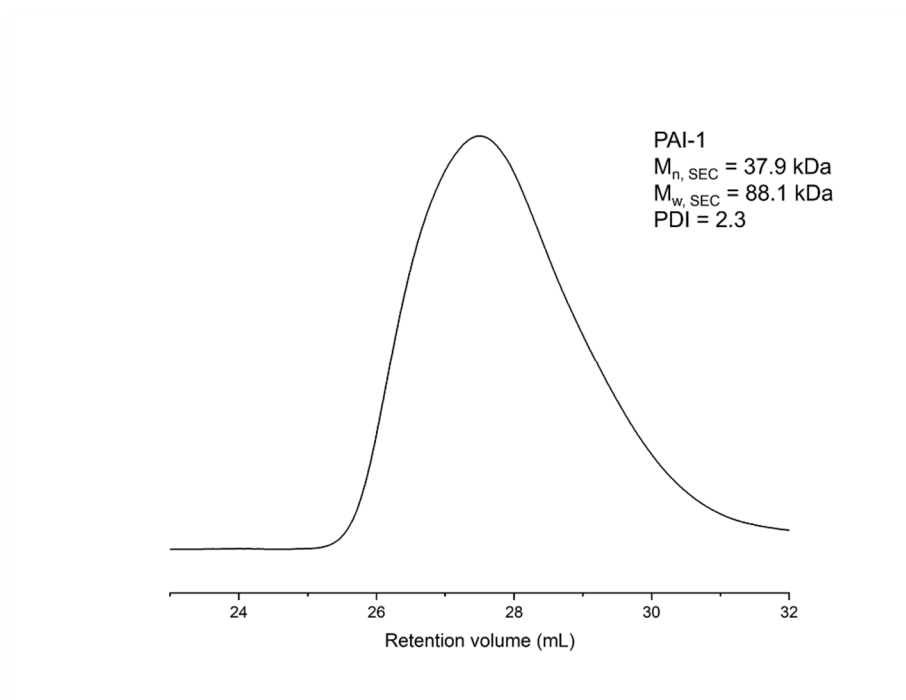

**Figure S3.** GPC diagram of **PAI-1**.

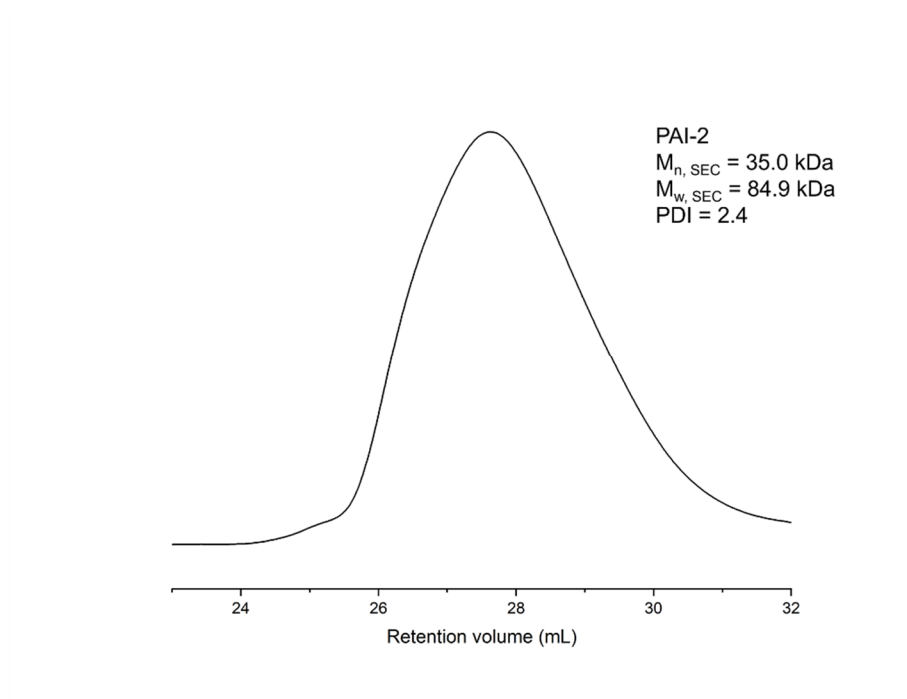

Figure S4. GPC diagram of PAI-2.

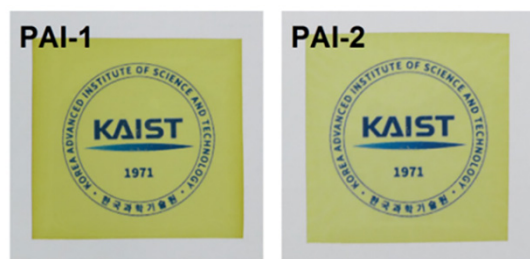

Figure S5. Free standing films of PAI-1 and PAI-2.

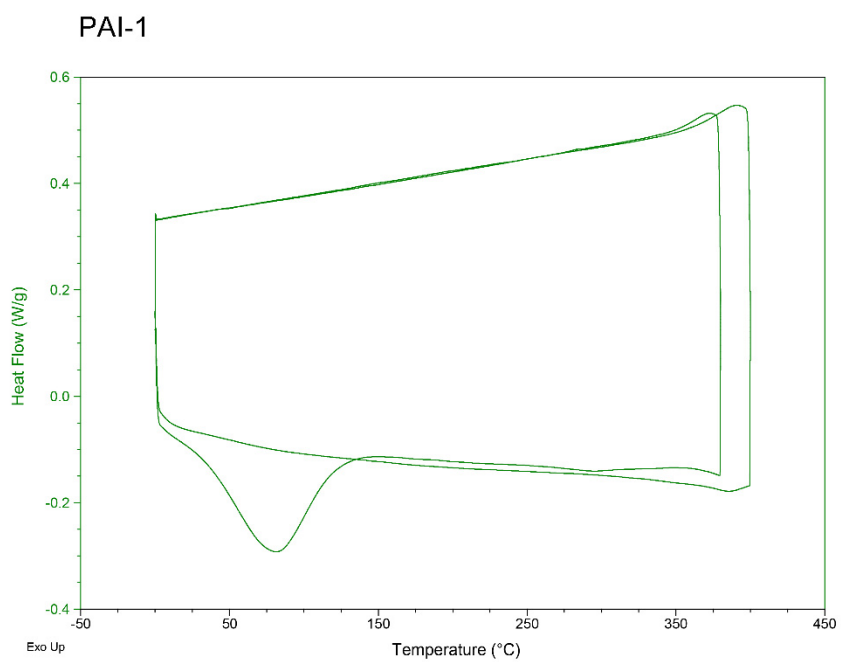

**Figure S6.** DSC curves of **PAI-1**.

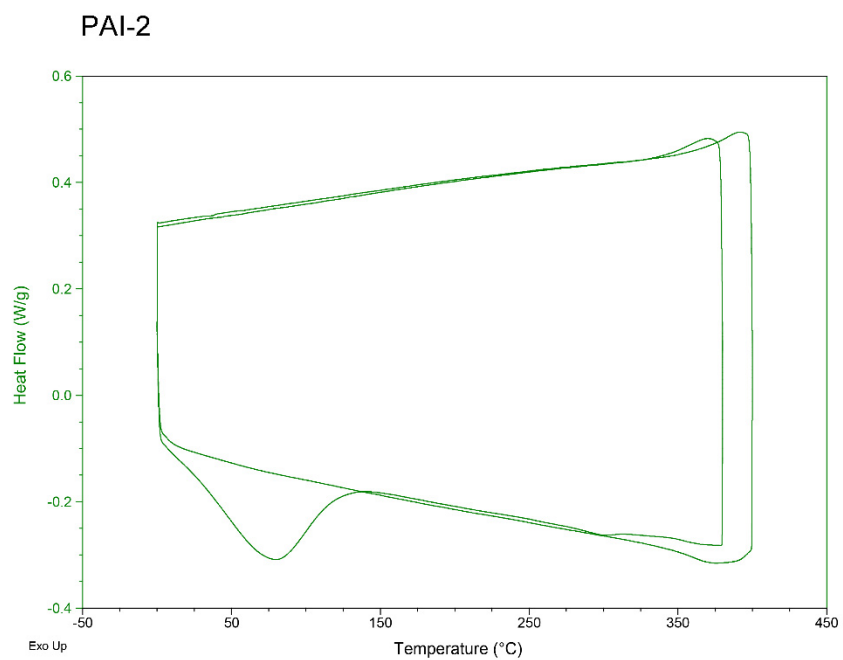

**Figure S7.** DSC curves of **PAI-2**.

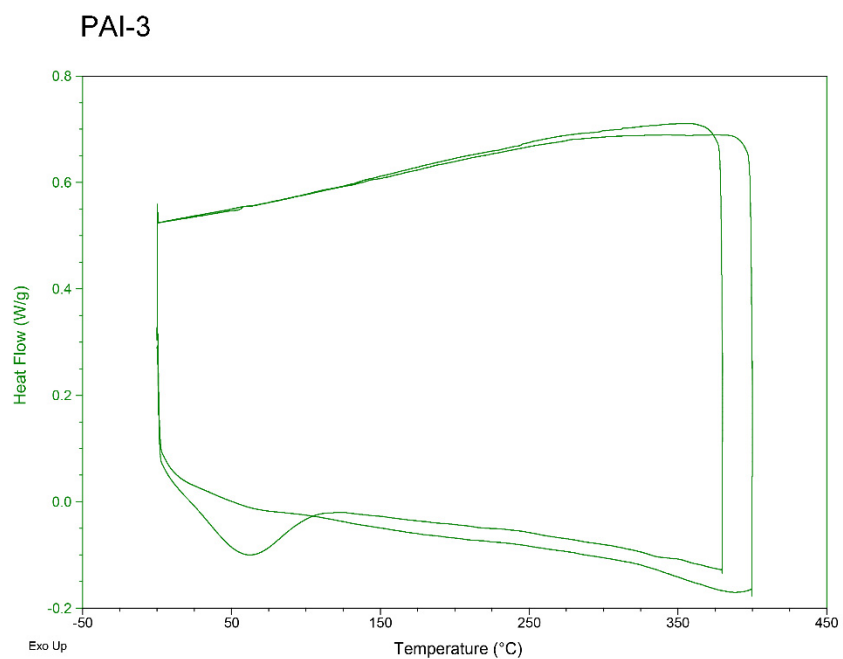

**Figure S8.** DSC curves of **PAI-3**.

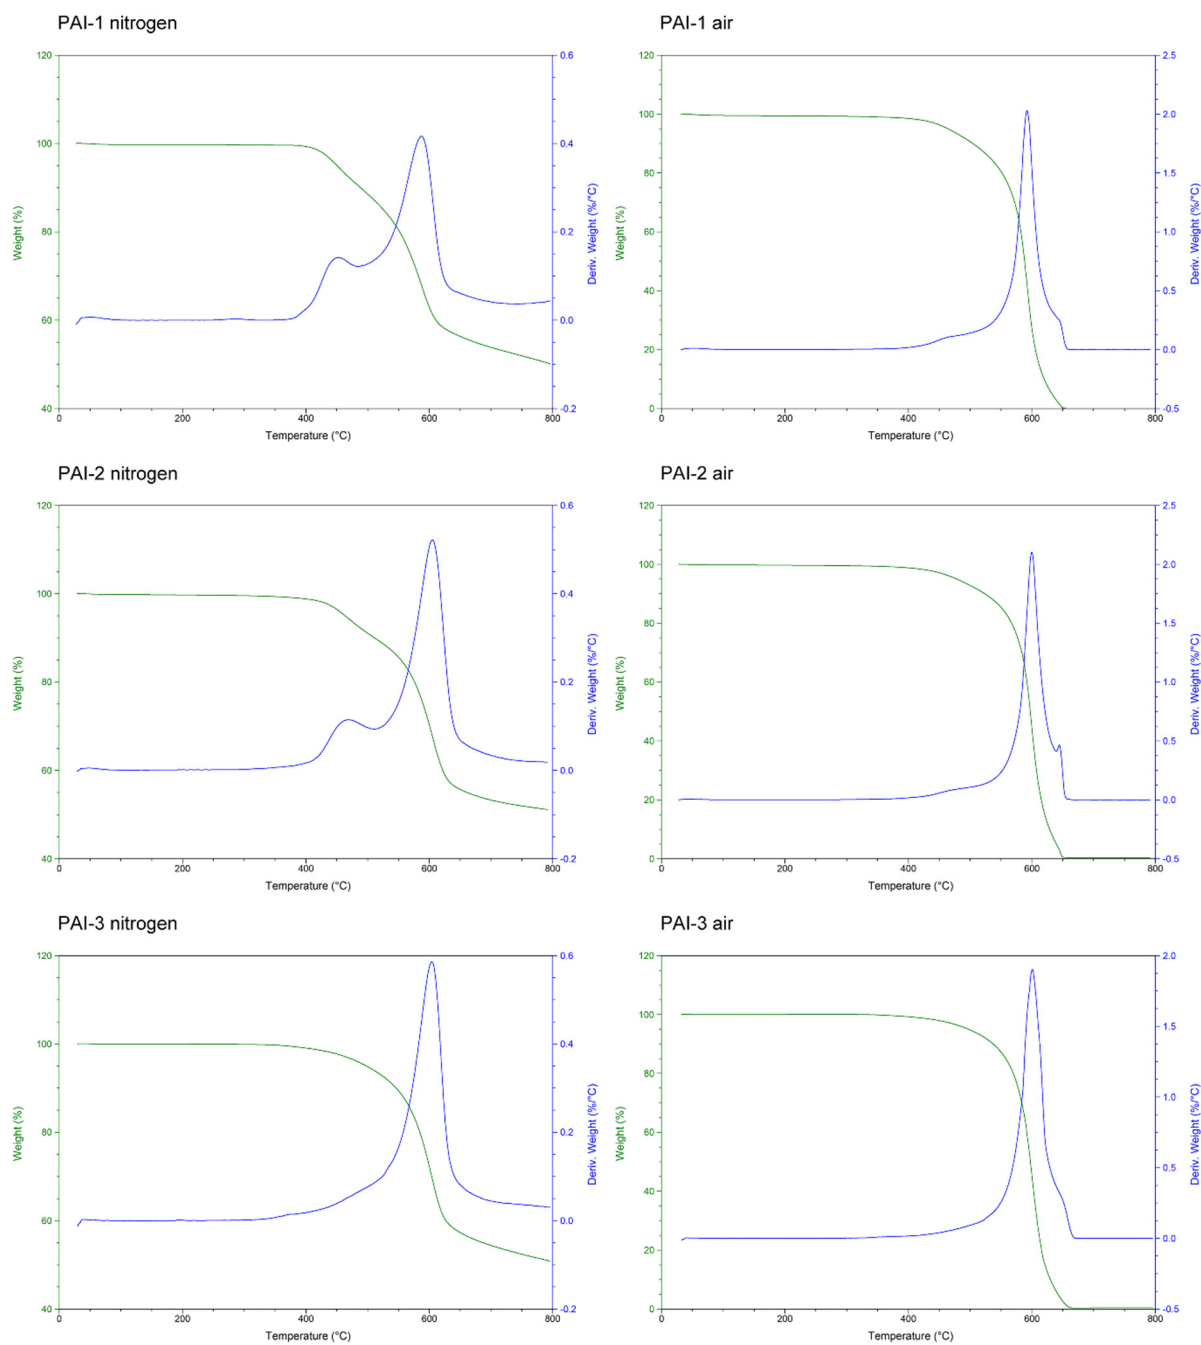

**Figure S9.** TGA curves of PAI-1, PAI-2 and PAI-3.

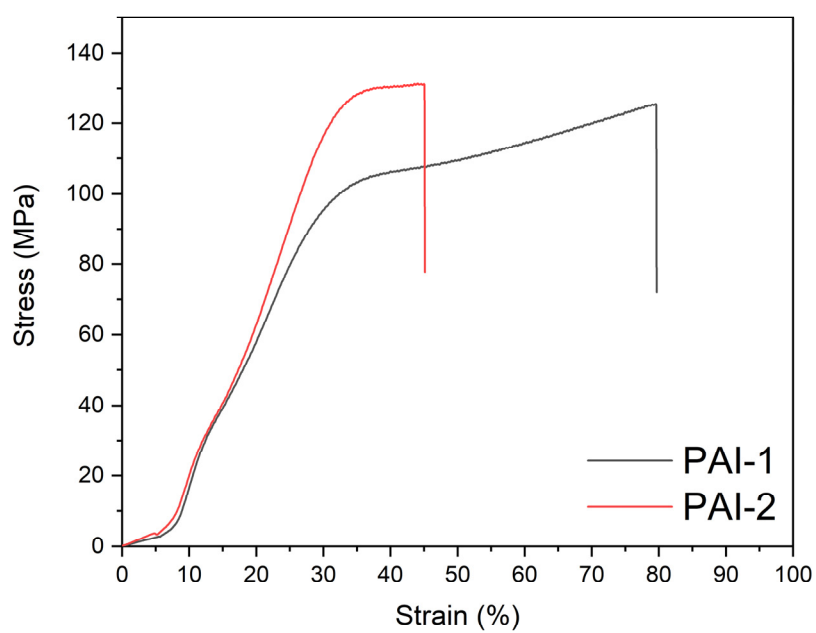

**Figure S10.** Mechanical properties of PAIs.

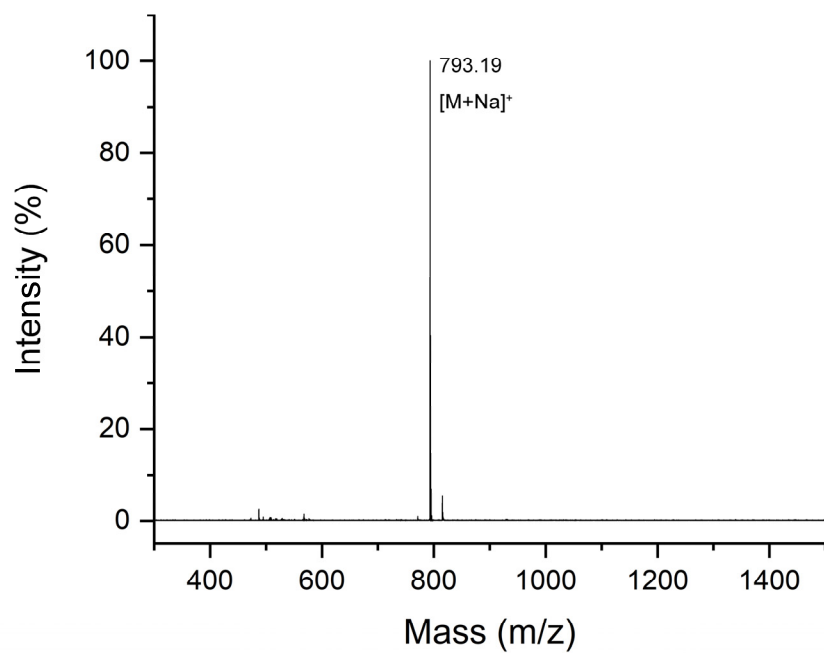

**Figure S11.** MALDI-TOF of diamide-diamine monomer synthesized in this study (3).
